# Supplementary material
Source: MDPI journal article supplement (https://www.mdpi.com/2071-1050/12/13/5407)
Supplement: s1 [file s1]

## Sheet: Base model
Heller-Hager model
Derived from the method found in Heller, V., Hager, W., and Minor, H. E.: Landslide generated impulse waves in reservoirs: Basics and computation. Laboratory of Hydraulics, Hydrology, and Glaciology, ETH Zürich, Switzerland, 172pp, 2009.
Spreadsheet created by Rachel Chisolm and Jonathan Lala, Center for Water and the Environment, University of Texas at Austin
This sheet is the base model. A modified models accounting for dual avalanche trajectory slopes is shown in the sheet "Dual Slope"
Highlighted cells require an input value from the user. All other cells will self-compute. Note that Vs (slide impact velocity) should be taken from the avalanche model (e.g. RAMMS). If no avalanche model is used, the italicized, underlined value to the right of Vs can be used as an empirical value. Note however that this may differ significantly from the value taken from a numerical model like R…
g	9.81	gravitational acceleration			Limitations for calculating wave height			Acceptable range
dz	1482	drop in height from center of gravity of slide (m)			D	1	relative slide density	0.59-1.72
alpha	41	slide impact angle (avg. slope angle, deg.)	0.715585		V	#DIV/0!	relative slide volume	0.05-5.94
delta	20	dynamic bed friction angle (deg.)	0.349066		B	0	relative slide width	0.74-3.33
Vs	130.009	slide impact velocity (m/s)	130.009		X		relative streamwise distance	2.7-59.2
hi	13.29	still water depth at slide impact (m)			F	11.3861	slide Froude #	0.86-6.83
F	11.3861	slide Froude #			S	0	relative slide thickness (=s/h)	0.09-1.64
rho_s	1000	density of slide material (kg/m^3)			M	#DIV/0!	relative slide mass	0.11-10.02
rho_w	1000	density of water (kg/m^3)			alpha	41	slide impact angle (avg. slope angle)	30-90
b		slide width (m) (reservoir width if slide > reservoir)			P	#DIV/0!	impulse product parameter	0.17-8.13
V_s		bulk slide volume (m^3)			Limitations for calculating run-up height
M	#DIV/0!	relative slide mass			Hx/hx	#DIV/0!	relative wave ht. at dam	0.011-0.521
s		max slide thickness at moment of impact (m)			H(x)/L(x)	#DIV/0!	wave steepness at dam	0.001-0.013
S	0	relative slide thickness (=s/h)			90/beta	#DIV/0!	relative angle at dam	1.0-4.9
P	#DIV/0!	impulse product parameter			Limitations for calculating overtopping volume
Hm	#DIV/0!	maximum wave ht. (m)			H/h	#DIV/0!	relative wave ht. at dam	0.019-0.488
xm	#DIV/0!	distance of max wave ht. from impact (m)			a/H	#DIV/0!	non-linearity	0.59-0.95
Tm	#DIV/0!	wave period of max. wave (s)			H/L	#DIV/0!	wave steepness	0.001-0.023
a_m	#DIV/0!	maximum wave amplitude (m)			T(g/h)^(1/2)	#DIV/0!	relative period	9.0-21.0
c	#DIV/0!	solitary wave celerity (m/s)			c^2/(gh)	#DIV/0!	relative wave celerity	0.83-1.40
Lm	#DIV/0!	wave length of max. wave (m)			L/h	#DIV/0!	relative wave length	6.0-24.0
x		streamwise distance (m)			90/beta	#DIV/0!	relative angle at dam	1.0-4.9
X	0	relative streamwise dist. (X=x/h)
H(x)	#DIV/0!	wave ht. at x (m)
T(x)	#DIV/0!	wave period at x (s)
a(x)	#DIV/0!	amplitude at x(m)
c(x)	#DIV/0!
L(x)	#DIV/0!
hx		still water depth immediately upstream of dam (m)
R	#DIV/0!	run-up ht. (m)
f		freeboard (m)
beta		run-up angle (dam face slope) (deg.)
bK		crest width (m)
a_max	#DIV/0!	max. overtopping depth over dam (=H(x)-f)
a_max/bK	#DIV/0!	relative max. overtopping depth
kq	FALSE	overfall coeff. For steady case
kb	#DIV/0!	overfall coeff. For crest width
kw	FALSE	overfall coeff. For increased flow energy
k	#DIV/0!	overfall coeff. For overtopping
V0	#DIV/0!	overtop volume per unit width w/ f=0
V	#DIV/0!	overtop volume per unit length dam crest (m^3/m)
	#DIV/0!	total overtop volume

## Sheet: Dual Slope
This sheet was created to capture the change in slope that occurs in the avalanche trajectory northeast of Nangama. The first block represents the initial slope, and the second block represents the slope at which the avalanche enters the lake
	g	9.81	gravitational acceleration			Limitations for calculating wave height			Acceptable range
Intial slope	dz_scN	229	drop in height from center of gravity of slide (mountain, m)			D	1.25	relative slide density	0.59-1.72
	(distance)	242	Horizontal displacement of slide (mountain, m)			V	3.40136	relative slide volume	0.05-5.94
	alpha_N	43.419	mountain average slope angle (deg)	0.757804		B	10.7143	relative slide width	0.74-3.33
	delta_N	20	dynamic mountain face friction angle (deg.)	0.349066		X	85.7143	relative streamwise distance	2.7-59.2
	Vs_sNK	-	slide velocity at point of slope change (m/s)	52.5817		F	2.05179	slide Froude #	0.86-6.83
Final slope	dz_sc	195	drop in height from center of gravity of slide (glacier, m)			S	0.357143	relative slide thickness (=s/h)	0.09-1.64
	(distance)	761	Horizontal displacement of slide (glacier, m)			M	4.2517	relative slide mass	0.11-10.02
	alpha	14.3723	glacier slide impact angle (avg. slope angle)	0.250845		alpha	14.3723	slide impact angle (avg. slope angle)	30-90
	delta	20	dynamic glacier bed friction angle (deg.)	0.349066		P	1.74035	impulse product parameter	0.17-8.13
	Vs	34.0053	slide impact velocity (m/s)	34.0053		Limitations for calculating run-up height
	hi	28	still water depth at slide impact (m)	Cook & Quincey, 2015		Hx/hx	1.99654	relative wave ht. at dam	0.011-0.521
	F	2.05179	slide Froude #			H(x)/L(x)	0.0126022	wave steepness at dam	0.001-0.013
	rho_s	1250	density of slide material (kg/m^3)			90/beta	2.68461	relative angle at dam	1.0-4.9
	rho_w	1000	density of water (kg/m^3)			Limitations for calculating overtopping volume
	b	300	slide width (m) (reservoir width if slide > reservoir)	width of main part of reservoir		H/h	1.99654	relative wave ht. at dam	0.019-0.488
	Vol_s	800000	bulk slide volume (m^3)			a/H	1.59723	non-linearity	0.59-0.95
	M	4.2517	relative slide mass			H/L	0.0126022	wave steepness	0.001-0.023
	s	10	max slide thickness at moment of impact (m)			T(g/h)^(1/2)	98.3048	relative period	9.0-21.0
	S	0.357143	relative slide thickness (=s/h)			c^2/(gh)	2.59723	relative wave celerity	0.83-1.40
	P	1.74035	impulse product parameter			L/h	158.427	relative wave length	6.0-24.0
	Hm	24.2323	maximum wave ht. (m)			90/beta	2.68461	relative angle at dam	1.0-4.9
	xm	203.16	distance of max wave ht. from impact (m)
	Tm	20.0588	wave period of max. wave (s)
	a_m	19.3858	maximum wave amplitude (m)
	c	21.5605	solitary wave celerity (m/s)
	Lm	432.478	wave length of max. wave (m)
	x	2400	streamwise distance (m)	length to breach (2000 for current lake)
	X	85.7143	relative streamwise dist. (X=x/h)
	H(x)	9.98269	wave ht. at x (m)
	T(x)	70.1819	wave period at x (s)
	a(x)	7.98615	amplitude at x(m)
	c(x)	11.2869
	L(x)	792.136
	hx	5	still water depth immediately upstream of dam (m)
	R	34.8286	run-up ht. (m)
	f	7	freeboard (m)
	beta	33.5245	run-up angle (dam face slope) (deg.)	based on lateral moraine before breach
	bK	300	crest width (m)
	a_max	2.98269	max. overtopping depth over dam (=H(x)-f)
	a_max/bK	0.0099423	relative max. overtopping depth
	kq	0.487256	overfall coeff. For steady case
	kb	0.601988	overfall coeff. For crest width
	kw	1.3	overfall coeff. For increased flow energy
	k	0.434771	overfall coeff. For overtopping
	V0	304.458	overtop volume per unit width w/ f=0
	V	185.844	overtop volume per unit length dam crest (m^3/m)
		55753.2	total overtop volume
